# Supplementary material
Source: publisher site journal article supplement (https://www.dovepress.com/get_supplementary_file.php?f=502132.docx)
Supplement: Supplementary file 1 [file get_supplementary_file.php]

**Supplemental Materials**

**Contents**

**Supplement Table 1** Coordinates of each hospital in the study area

**Supplement Figure 1** The locations of air pollutants monitoring stations and hospitals in Henan, China

**Supplement Table 2** Coordinates of each city air monitoring station in the study area

**Supplement Figure 2** Monthly number of CM case ,Low DTR (0-3 °C) and High DTR (15.5 -23.2°C) during the study period of 2016-2021

**Supplement Figure 3** The exposure–response curve between CM and DTR with changing the degrees of freedom from 3-5 for mean temperature, humidity, PM2.5, and SO2velocity; 7-9 for long-term trend and seasonality

**Supplement Table 1** Coordinates of each hospital in the study area

| City | Hospital Name | Longitude, N | Latitude, E |
| --- | --- | --- | --- |
| Xinxiang | The First Affiliated Hospital of Xinxiang Medical University | 114.059 | 35.408 |
| The Third Affiliated Hospital of Xinxiang Medical University | 113.925 | 35.281 |
| The Affiliated People's Hospital of Xinxiang Medical University | 113.869 | 35.306 |
| Nanyang | Nanyang Central Hospital | 112.529 | 33.008 |
| Anyang | Anyang First People's Hospital | 114.412 | 36.076 |
| Kaifeng | Hospital of Traditional Chinese Medicine Affiliated to Henan University | 114.368 | 34.805 |
| Luoyang | The First Affiliated Hospital of Henan University of Science and Technology | 112.427 | 34.599 |


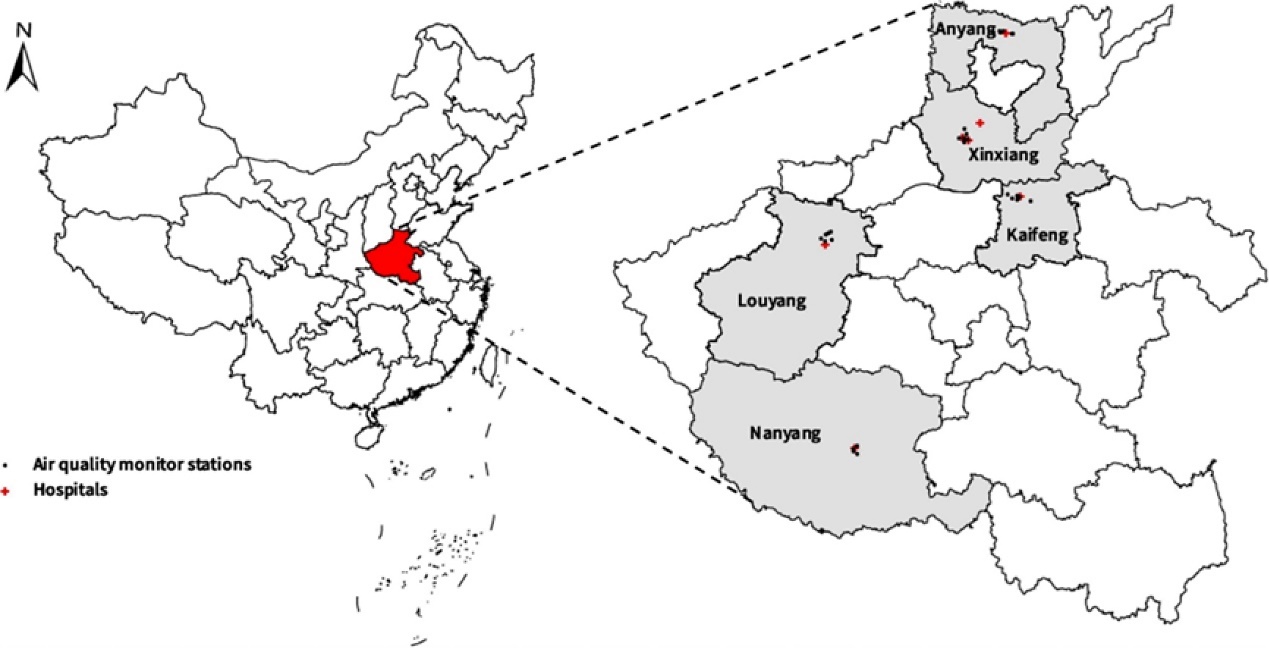


**Supplement Figure 1** The locations of air pollutants monitoring stations and hospitals in Henan, China.

**Supplement Table 2** Coordinates of each city air monitoring station in the study area

| City | City code | Station code | Longitude, N | Latitude, E |
| --- | --- | --- | --- | --- |
| Xinxiang | 410700 | 2389A | 113.836 | 35.310 |
| 2390A | 113.884 | 35.272 |
| 2391A | 113.883 | 35.303 |
| 3054A | 113.919 | 35.285 |
| 3476A | 113.914 | 35.333 |
| 3689A | 113.900 | 35.372 |
| Nanyang | 411300 | 2403A | 112.519 | 32.992 |
| 2404A | 112.522 | 33.012 |
| 2406A | 112.557 | 33.027 |
| 2407A | 112.550 | 32.968 |
| Anyang | 410500 | 1818A | 114.484 | 36.062 |
| 1819A | 114.355 | 36.102 |
| 1820A | 114.358 | 36.087 |
| 3141A | 114.392 | 36.088 |
| 3669A | 114.471 | 36.064 |
| 3703A | 114.292 | 36.095 |
| Kaifeng | 410200 | 1824A | 114.339 | 34.778 |
| 1826A | 114.289 | 34.797 |
| 3147A | 114.344 | 34.811 |
| 3210A | 114.364 | 34.796 |
| 3473A | 114.249 | 34.831 |
| 3592A | 114.464 | 34.756 |
| Luoyang | 410300 | 1812A | 112.394 | 34.651 |
| 1814A | 112.466 | 34.687 |
| 1815A | 112.494 | 34.689 |
| 1817A | 112.428 | 34.626 |
| 3341A | 112.495 | 34.633 |
| 3636A | 112.439 | 34.678 |


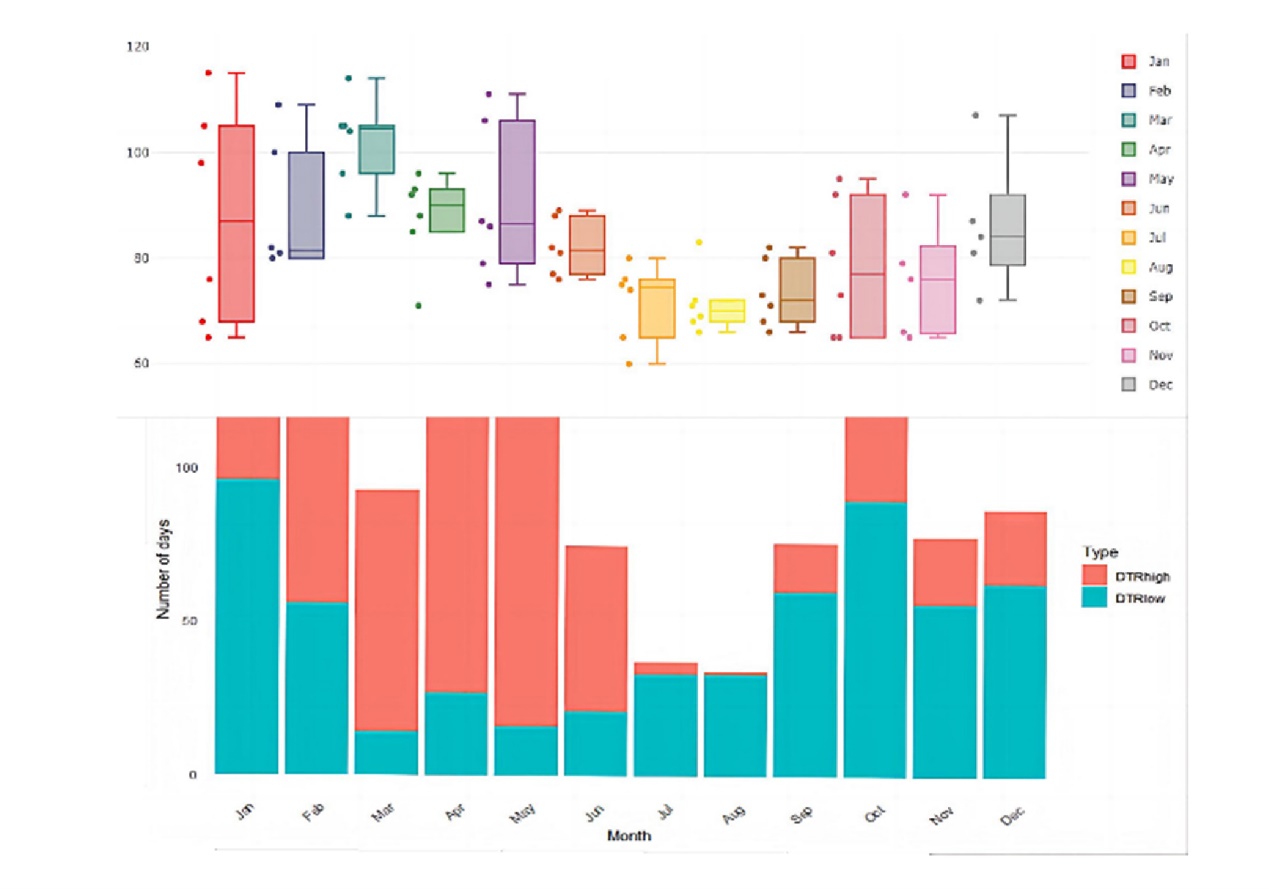


**Supplement Figure 2** Monthly number of CM case ,Low DTR (0-3 °C) and High DTR (15.5 -23.2°C) during the study period of 2016-2021.


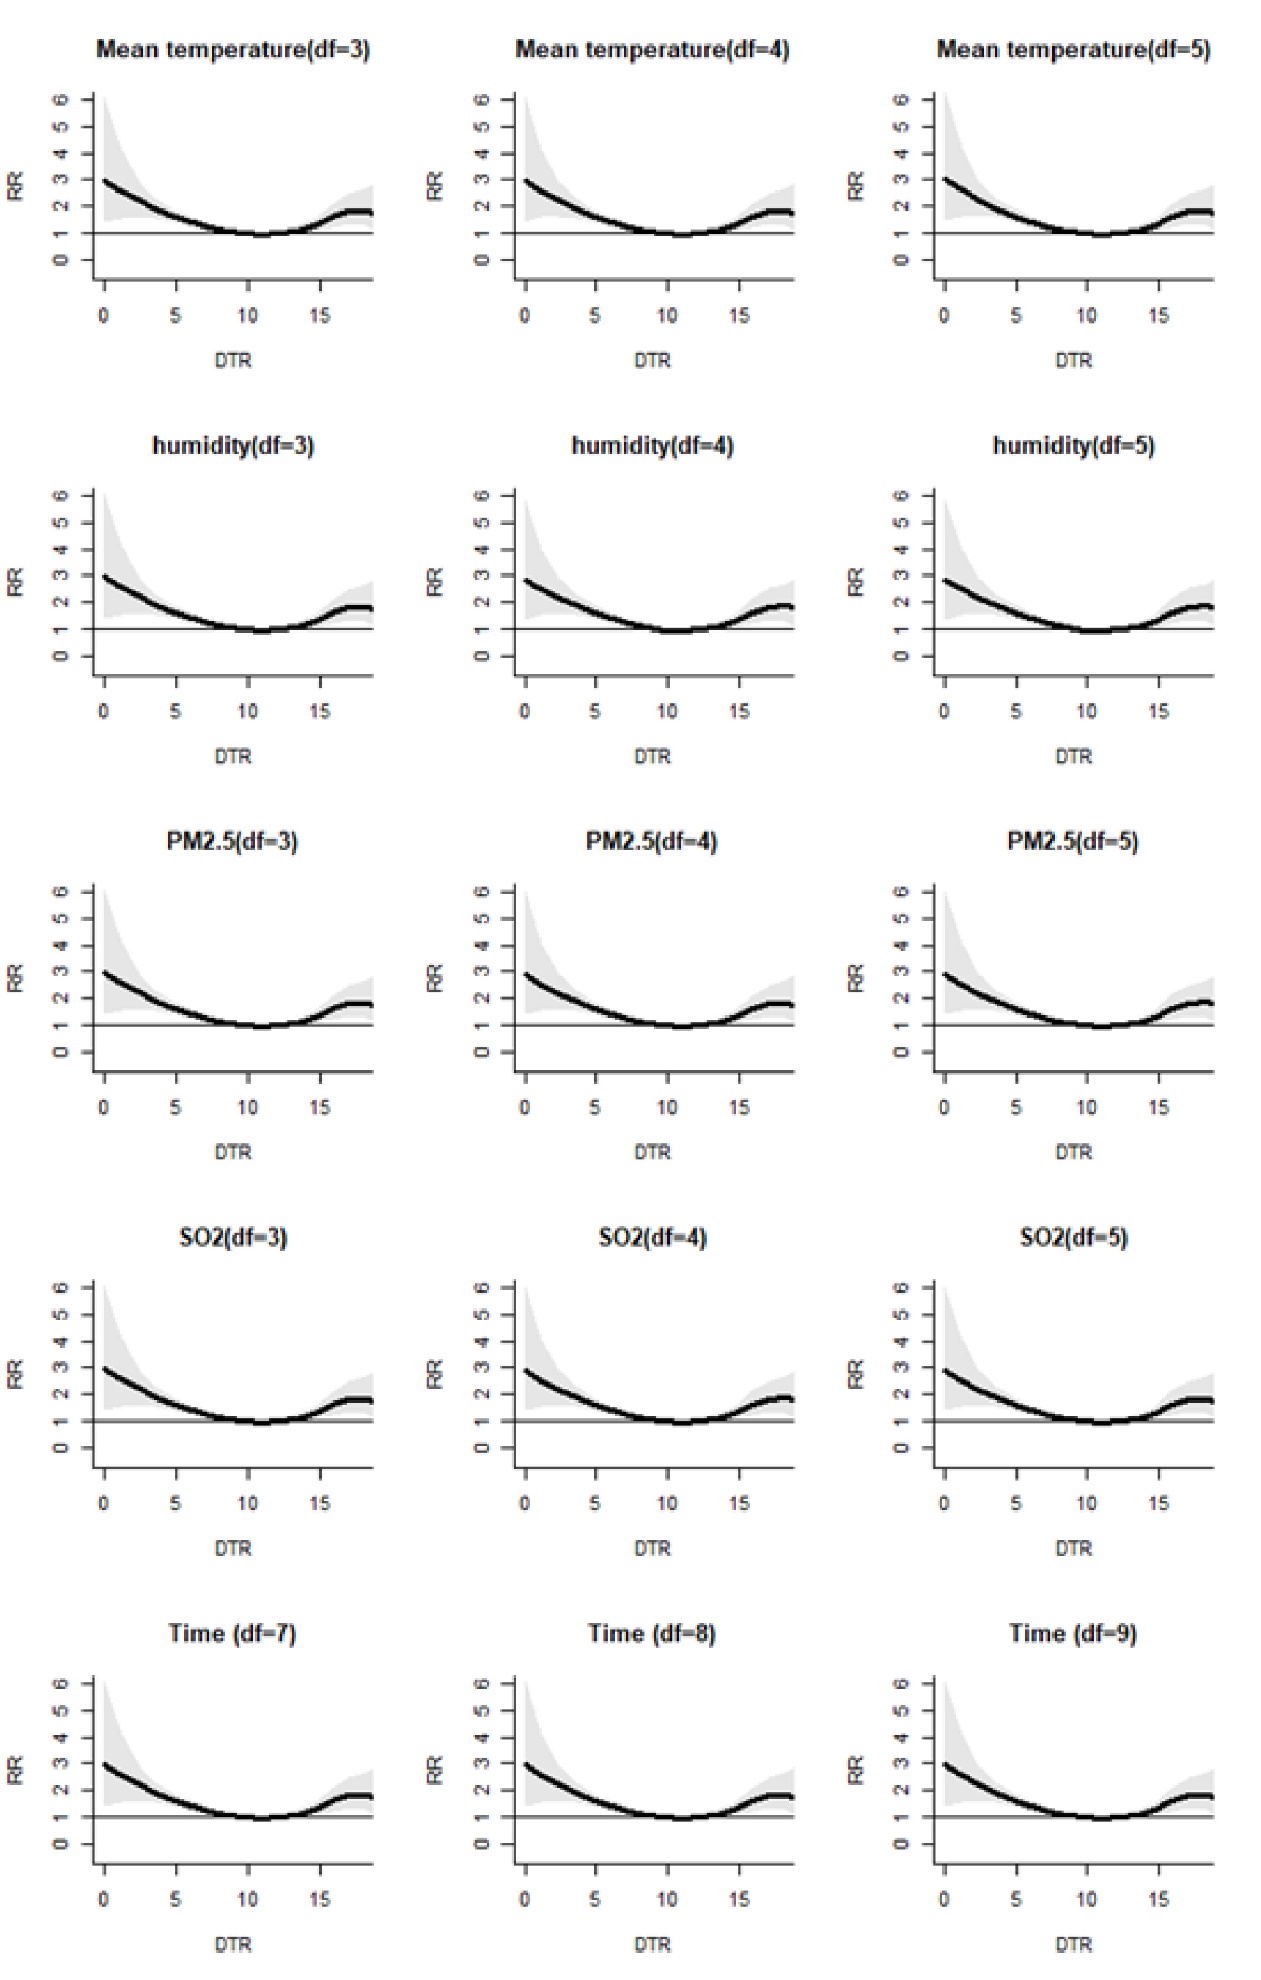


**Supplement Figure 3** The exposure–response curve between CM and DTR with changing the degrees of freedom from 3-5 for mean temperature, humidity, PM2.5, and SO2velocity; 7-9 for long-term trend and seasonality.
